# Supplementary material for: Transcriptome Profiles of the Liver in Two Cold-Exposed Sheep Breeds Revealed Different Mechanisms and Candidate Genes for Thermogenesis
Source: Hindawi journal article supplement (doi:10.1155/2021/5510297), 2021-08-10
Supplement: f1 [file 5510297.f1.zip]

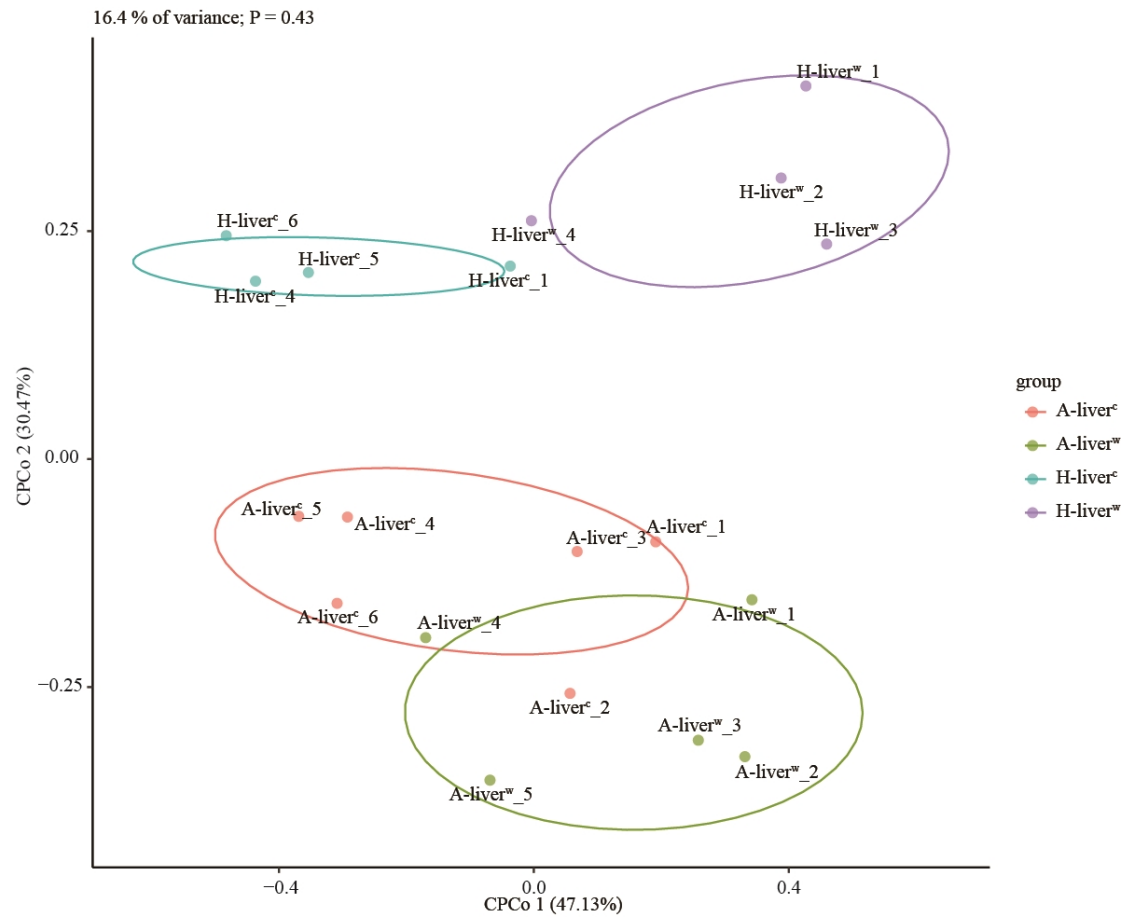

Figure S1. CPCoA analyses of all samples and sequencing quality in the liver of Altay and Hu lambs.

A-liver<sup>c</sup> and H-liver<sup>c</sup>: liver of cold-exposed (-5 °C) Altay and Hu lambs; A-liver<sup>w</sup> and H-liver<sup>w</sup>: liver of warm-exposed (20 °C) Altay and Hu lambs; red points represent liver of cold-exposed (-5 °C) Altay lambs, green points represent liver of warm-exposed (20 °C) Hu lambs, blue points represent liver of warm-exposed (-5 °C) Altay lambs and purple points represent liver of warm-exposed (20 °C) Hu lambs.
